# Supplementary material
Source: publisher figshare collection journal article supplement (https://acs.figshare.com/ndownloader/files/7979212)
Supplement: Supplementary file 1 [file 7979212]

## Supporting Information

### **Study of Arylamine-Substituted Porphyrins as Hole-Transporting Materials in High-Performance Perovskite Solar Cells**

Song Chen,<sup>†</sup> Peng Liu,<sup>‡</sup> Yong Hua,<sup>‡\*</sup> Yuanyuan Li,<sup>§</sup> Lars Kloo,<sup>‡\*</sup> Xingzhu Wang,<sup>†</sup> Beng Ong,<sup>†</sup> Wai-Kwok Wong,<sup>†\*</sup> Xunjin Zhu,<sup>†\*</sup>

<sup>†</sup> Institute of Molecular Functional Materials, Research Centre of Excellence for Organic Electronics, Department of Chemistry and Institute of Advanced Materials, Hong Kong Baptist University, Waterloo Road, Kowloon Tong, Hong Kong, P. R. China.

E-mail: xjzhu@hkbu.edu.hk; wkwong@hkbu.edu.hk

<sup>‡</sup> Applied Physical Chemistry, Centre of Molecular Devices, Department of Chemistry, School of Chemical Science and Engineering, and <sup>§</sup> Wallenberg Wood Science Center, Department of Fiber and Polymer Technology, Chemical Science and Engineering, KTH Royal Institute of Technology, SE-10044 Stockholm, Sweden.

E-mail: yonghua@kth.se; larsa@kth.se.

<sup>†</sup> College of Chemistry, Xiangtan University, Xiangtan 411105, Hunan Province, P. R. China.

## Experimental Section

### Characterization

$^1\text{H}$  NMR spectra were recorded using a Bruker Ultrashield 400 Plus NMR spectrometer. High-resolution matrix-assisted laser desorption/ionization time-of-flight (MALDI-TOF) mass spectra were obtained with a Bruker Autoflex MALDI-TOF mass spectrometer. UV-vis spectra of dilute solutions ( $1 \times 10^{-5}$  M) of samples in  $\text{CHCl}_3$  were recorded at room temperature (ca.  $25^\circ\text{C}$ ) using a Shimadzu UV-3600 spectrophotometer. SEM images were obtained from JEOL JSM-7401F operating at 2 kV. The excitation of the sample was carried out with a picosecond diode laser (Edinburgh Instrument, EPL470) at 470 nm. The optimum geometries of **CuP** and **ZnP** and their electron-state-density distributions of HOMOs and LUMOs were investigated by performing density functional theory (DFT) calculations using the cam-B3LYP3 and the 6-31G\*\* basis set for all atoms, without any symmetry constraints. All reported calculations were carried out by means of Gaussian 09.<sup>1, 2</sup>

### Electrochemical Measurements

Electrochemical experiments were performed with a CH Instruments electrochemical workstation (model 660A) using a conventional three-electrode electrochemical cell. A glassy carbon electrode (diameter 3mm) was used as the working electrode, a platinum wire as the counter electrode, an  $\text{Ag}/\text{AgNO}_3$  electrode as the reference electrode and 0.1 M of tetrabutylammoniumhexafluorophosphate ( $n\text{-Bu}_4\text{NPF}_6$ ) in dichloromethane solution as supporting electrolyte. The cyclic voltammetric scan rate was 50 mV/s. Each measurement was calibrated with Fc.  $E_{1/2}^{\text{Fc}} = 0.20$  V.  $E_{\text{HOMO}} = -5.1 - (E_{1/2} - E_{1/2}^{\text{Fc}})$ .

### Conductivity Measurement

The electrical conductivities of the HTMs films were determined by using two-probe electrical conductivity measurements, which were performed by following published

procedure.<sup>3</sup> Conductivity devices structure was shown in **Fig. S1**, and the electrical conductivity ( $\sigma$ ) was calculated by using the following equation (1):

$$\sigma = \frac{W}{R L D} (1)$$

where  $L$  is the channel length 10 mm,  $W$  is the channel width 2 mm,  $D$  is the film thickness of the TiO<sub>2</sub> and HTM, and  $R$  is the film resistance calculated from the gradients of the curves.

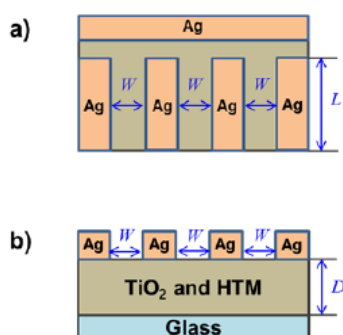

**Figure S1.** Schematic illustrations of the conductivity device: (a) top-sectional view; (b) cross-sectional view.

The conductivity devices were fabricated as following. Glass substrates without conductive layer were carefully cleaned in ultrasonic baths of detergents, deionized water, acetone and ethanol successively. A thin layer of nanoporous TiO<sub>2</sub> was coated on the glass substrates by spin-coating with a diluted TiO<sub>2</sub> paste (Dyesol DSL 18NR-T) with terpineol (1:3, mass ratio). The thickness of the film is ca. 500 nm, as measured with a DekTakprofilometer. After sintering the TiO<sub>2</sub> film on a hotplate at 500 °C for 30 min, the film was cooled to room temperature. A solution of HTMs in chlorobenzene was subsequently deposited by spin-coating. Here the concentration of **CuP** or **ZnP** is 20 mg mL<sup>-1</sup> in chlorobenzene. The doped Spiro-OMeTAD/chlorobenzene (80 mg/mL) solution was prepared with addition of 20  $\mu$ L Li-TFSI (520 mg Li-TFSI in 1 mL acetonitrile), and 30  $\mu$ L tert-butylpyridine (tBP). Subsequently, a 200 nm thick Ag back contact was deposited onto the organic semiconductor by thermal evaporation in a vacuum chamber with a base pressure of about 10<sup>-6</sup> bar, to complete the device fabrication.  $J$ - $V$  characteristics were recorded on a Keithley 2400 semiconductor characterization system.

## Mobility Measurements

Due to the low mobility of charge carriers in organic semiconductors, the injected carrier forms a space charge. This space charge creates a field that opposes the applied bias and thus decreases the voltage drop across junction; as a result, space charge limited currents (SCLCs) have been proposed as the dominant conduction mechanism in organic semiconductors by researchers. Mobility devices structure was shown in **Fig. S-2**, and ohmic conduction can be described by equations (2):

$$J = \frac{9}{8} \mu \epsilon_0 \epsilon_r \frac{V^2}{d^3} \quad (2)$$

where  $J$  is the current density,  $\mu$  is the hole mobility,  $\epsilon_o$  is the vacuum permittivity ( $8.85 \times 10^{-12}$  F/m),  $\epsilon_r$  is the dielectric constant of the material (normally taken to approach 3 for OSs),  $V$  is the applied bias, and  $d$  is the film thickness.

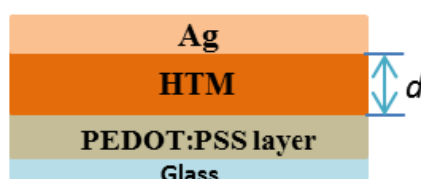

**Figure S2.** Schematic illustration of the mobility device

Fluorine-doped tin-oxide (FTO) coated glass substrates (Pilkington TEC15) were patterned by etching with zinc powder and 2 M hydrochloric acid. The substrates were carefully cleaned in ultrasonic baths of detergents, deionized water, acetone and ethanol successively. The remaining organic residues were removed with 10 min by airbrush. A 40 nm thick PEDOT: PSS layer was spin-coated onto the substrates, which were then annealed at 120 °C for 30 min in air. The substrates were then transferred into a glove box for further fabrication steps. The HTMs were dissolved in anhydrous chlorobenzene. Here the concentration of **CuP** or **ZnP** is 20 mg mL<sup>-1</sup> in chlorobenzene. The doped Spiro-OMeTAD/chlorobenzene (80 mg/mL) solution was prepared with addition of 20 µL Li-TFSI (520 mg Li-TFSI in 1 mL acetonitrile), and 30 µL tert-butylpyridine (tBP). This HTMs solution was spin-coated at 3000 rpm to

yield films. The thicknesses of the films are measured by using a Dektak 6M profilometer. 200 nm of silver was then evaporated onto the active layer under high vacuum (less than  $10^{-6}$  mbar). *J-V* characteristics of the devices have been measured with a Keithley 2400 Source-Measure unit, interfaced with a computer. Device 13 characterization was carried out in air.

### **Fabrication of perovskite solar cells**

Fluorine-doped tin-oxide (FTO) coated glass substrates (Pilkington TEC15) were etched with zinc powder and 2 M hydrochloric acid. The substrates were carefully cleaned in ultrasonic baths of detergents, deionized water, acetone and ethanol subsequently. A thin compact TiO<sub>2</sub> blocking layer was deposited onto the FTO substrate by spray pyrolysis on a hotplate at 450 °C. A mesoporous TiO<sub>2</sub> film was deposited on the compact TiO<sub>2</sub> blocking layer by spin-coating at 6000 rpm for 45 s, using a commercial 20 nm TiO<sub>2</sub> paste (Dyesol 18NRT, Dyesol) diluted in 2-propanol (1:3, weight ratio), followed by annealing at 525 °C for 30 min, then cooling down to room temperature. PbI<sub>2</sub> in N,N-dimethylformamide solution (510 mg mL<sup>-1</sup>) was stirred at 70 °C overnight. The PbI<sub>2</sub> solution was spin-coated on the mesoporous TiO<sub>2</sub> at 6000 rpm for 15 s and then dried at 100 °C for 15 min. After cooling down to the room temperature, the PbI<sub>2</sub> coated film was then dipped in the CH<sub>3</sub>NH<sub>3</sub>I solution (8.5 mg mL<sup>-1</sup> in 2-propanol) for 20 s. After the formation of the CH<sub>3</sub>NH<sub>3</sub>PbI<sub>3</sub>, the film was rinsed at 70 °C for further manipulation. After cooling down to the room temperature, the doped HTMs solution was deposited by spin-coating at 3000 rpm for 30 s. Here the concentration of **CuP** or **ZnP** is 20 mg mL<sup>-1</sup> in chlorobenzene. The doped Spiro-OMeTAD/chlorobenzene (80 mg/mL) solution was prepared with addition of 20 μL Li-TFSI (520 mg Li-TFSI in 1 mL acetonitrile), and 30 μL tert-butylpyridine (tBP). Finally, 200 nm of gold was thermally evaporated on top of the device to form the counter-electrode. The prepared PSCs samples were masked during the measurement with an aperture area of 0.126 cm<sup>2</sup> (diameter 4 mm) exposed under illumination.

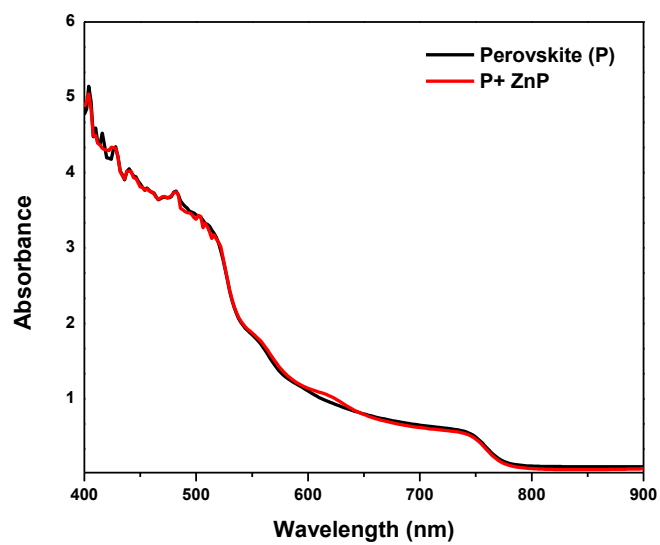

**Figure S3.** Absorption spectra of perovskite films with and without **ZnP**.

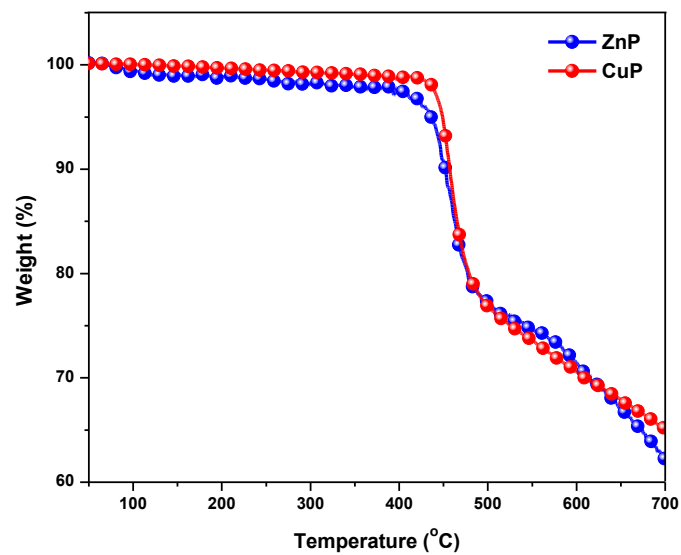

**Figure S4.** Thermogravimetric analysis of these two new HTMs

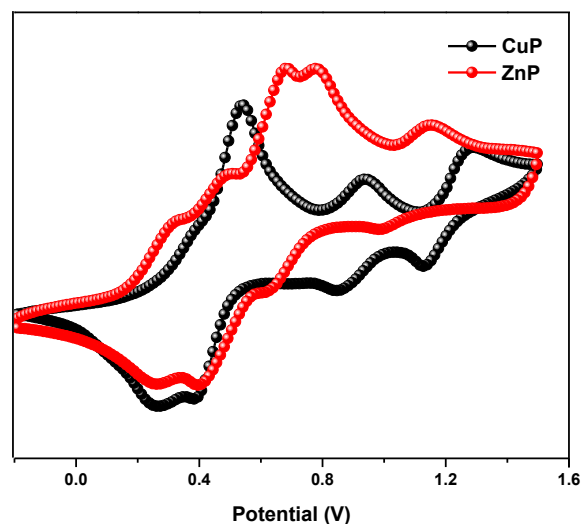

Figure S5. Cyclic voltammograms of **CuP** and **ZnP**.

**HONG KONG BAPTIST UNIVERSITY, DEPARTMENT OF CHEMISTRY (MALDI-TOF)**

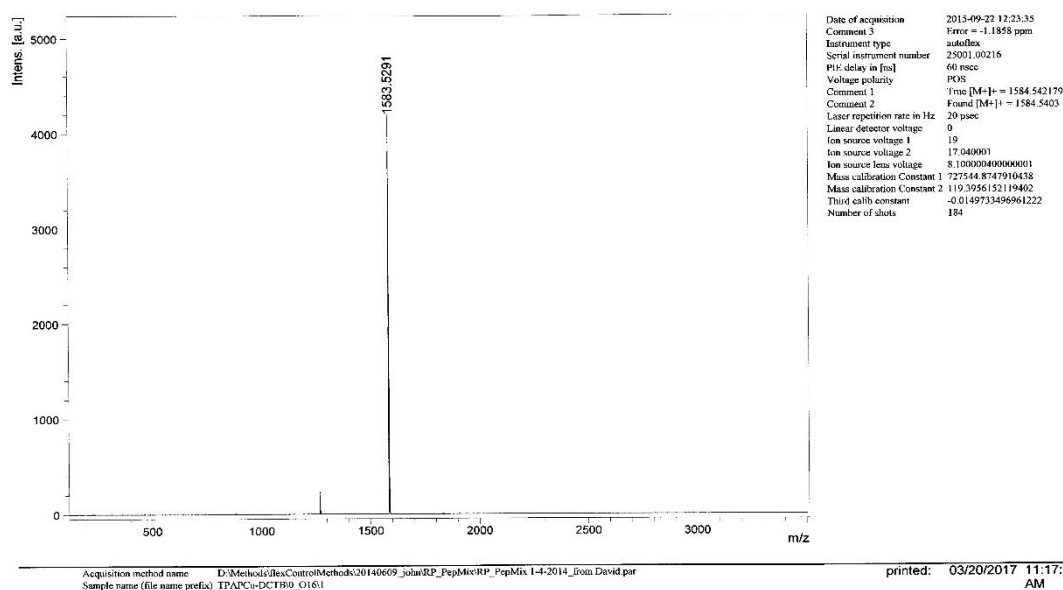

Figure S6. The MALDI-TOF mass spectrum of **CuP**.

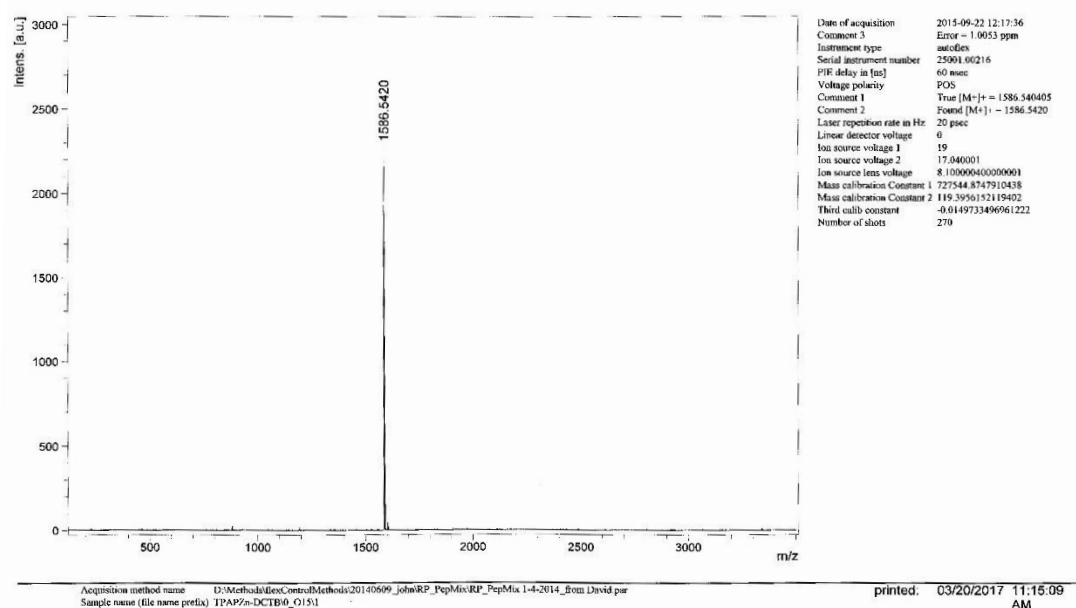

**Figure S7.** The MALDI-TOF mass spectrum of **ZnP**.

## References

- [1] Xu, B.; Sheibani, E.; Liu, P.; Zhang, J.; Tian, H.; Vlachopoulos, N.; Boschloo, G.; Kloo, L.; Hagfeldt, A.; Sun, L. Carbazole-Based Hole-Transport Materials for Efficient Solid-State Dye-Sensitized Solar Cells and Perovskite Solar Cells. *Adv. Mater.* **2014**, *26*, 6629-6634.
- [2] Xu, B.; Tian, H.; Bi, D.; Gabrielsson, E.; Johansson, E. M.; Boschloo, G.; Hagfeldt, A.; Sun, L. Efficient Solid State Dye-Sensitized Solar Cells Based on an Oligomer Hole Transport Material and an Organic Dye. *J. Mater. Chem. A* **2013**, *1*, 14467-14470.
- [3] Snaith, H. J.; Grätzel, M. Enhanced Charge Mobility in a Molecular Hole Transporter via Addition of Redox Inactive Ionic Dopant: Implication to Dye-Sensitized Solar Cells. *Appl. Phys. Lett.* **2006**, *89*, 262114-262116.
